# Supplementary material
Source: Elsevier journal article supplement (https://www.sciencedirect.com/science/article/pii/S0001731019300663)
Supplement: mmc1 [file S0001731019300663:mmc1.pdf]

## ALCANCE Y OBJETIVOS DE UNA GUÍA DE PRÁCTICA CLÍNICA DEL CARCINOMA DE MERKEL

### 1. Título de la Guía:

Carcinoma de células de Merkel: diagnóstico y tratamiento en atención especializada dermatológica

#### 1.1. Título Abreviado

Carcinoma de Merkel (CM)

### 2. Antecedentes

- a) *El CM de la piel es un tumor raro, agresivo, que afecta a personas mayores ( edad media de 76 años en las mujeres y de 74 en los hombres), casi exclusivamente de raza caucásica ( 95% de los casos)*
- b) *El CM puede llegar a mostrar una importante capacidad de diseminación metastásica a los ganglios linfáticos locales y regionales y a vísceras. No obstante en un reducido grupo de pacientes la enfermedad se frena con la cirugía y no evoluciona.*
- c) *Su epidemiología pone de manifiesto que, aunque predominan en personas mayores sobre piel expuesta a sol, también se afectan pacientes más jóvenes con inmunosupresión (linfomas B, infección por HIV, trasplantes de órganos...). Así mismo el CM es más frecuente en pacientes que padecen otras neoplasias. Hay estudios en el que se establece una asociación entre el CM y la leucemia linfática crónica.*
- d) *La patogénesis considera que es un tumor derivado de las células de Merkel de la capa basal de la epidermis. Otras hipótesis barajan la posibilidad de un origen en las "stem cell" totipotenciales. Varios trabajos atribuyen al poliomavirus de Merkel un papel relevante en el desarrollo del tumor.*
- e) *Debido a la escasa experiencia que existe resulta complejo tomar decisiones terapéuticas basadas en evidencias científicas sólidas, especialmente para definir el mejor método de estadiaje y de tratamiento inicial del tumor*

### 3. Necesidad clínica de una guía

Aunque la incidencia del CM es baja, es un tumor que se asocia con una mortalidad elevada. El diagnóstico inicial y el estadiaje presentan variabilidad, las técnicas a emplear podrían no estar disponibles en todos los centros y, por ello, nos parece necesario disponer de una Guía de Práctica Clínica adaptada a nuestro entorno. Esta guía debe revisar las principales técnicas diagnósticas empleadas en el diagnóstico inicial y estadiaje, así como los procedimientos terapéuticos para los tumores localizados. Para ello deberemos basarnos en las guías ya publicadas

En consecuencia

- a) *La guía debe mostrar actualizado el sistema de estadiaje TNM.*

- b) *La guía propondrá los criterios de manejo del tumor primario tras el diagnóstico: cirugía de la lesión con los márgenes, radioterapia complementaria, manejos de los ganglios linfáticos (importancia de la biopsia del ganglio centinela, radioterapia adyuvante, cirugía ganglionar, quimioterapia adyuvante).*
- c) *Se propondrán criterios de diagnóstico y tratamiento de las recurrencias locales.*
- d) *Se propondrán los criterios de derivación para tratamiento por otros especialistas*

#### 4. La guía

- a) El proceso de desarrollo de la guía se basará en el método ADAPTE, que se describe en un documento aparte.
- b) Este documento es el alcance, donde sus autores definen con precisión qué es lo que se abordará y lo que no se abordará en la guía. El alcance está basado en la solicitud de la AEDV.
- c) Las áreas tratadas por la guía se describen en las secciones siguientes.

##### 4.1. Población

###### 4.1.1. Grupos que se consideran

Pacientes con CM vistos en atención especializada dermatológica.

###### 4.1.2. Grupos que no se toman en consideración

###### 4.1.3. Aspectos clínicos que no están cubiertos

- a) Las estrategias de prevención.
- b) El tratamiento de la enfermedad diseminada (que realizan los oncólogos)

##### 4.2. Ámbito asistencial

- a) La guía cubrirá la asistencia que los dermatólogos prestan a estos pacientes en España, independientemente del sistema sanitario en el que se produzca la asistencia (privada/pública).

##### 4.3. Proceso asistencial

La guía examinará el diagnóstico de los pacientes, estadiaje o clasificación según riesgo de recurrencia/extensión, su tratamiento y su seguimiento posterior.

La guía revisará evidencias científicas sobre estos aspectos, incluyendo cuestiones relativas a los métodos de diagnóstico disponibles habitualmente, a los tratamientos médicos y quirúrgicos y al seguimiento de estos pacientes.

##### 4.4. Soporte para auditoria en la guía

La guía incorporará criterios de revisión y consejos para auditoría.

#### 4.5. Estatus

##### 4.5.1. Alcance

Esta es la versión final del alcance.

##### 4.5.2. Guía

El desarrollo de las recomendaciones de la guía empezará en junio de 2016.

#### 5. Información adicional

Se pretende la publicación de las guías en la revista Actas Dermo-Sifiliográficas para su difusión.
